# Supplementary material for: In situ fabrication of a novel CdS/ZnIn2S4/g-C3N4 ternary heterojunction with enhanced visible-light photocatalytic performance
Source: Royal Society of Chemistry journal article supplement (doi:10.1039/d2ra06328j), 2022-01-01
Supplement: d2ra06328j1.pdf [file d2ra06328j1.pdf]

Electronic Supplementary Material (ESI) for Dalton Transactions

This journal is © The Royal Society of Chemistry 2022

## Supporting Information

### **In situ fabrication of a novel CdS/ZnIn<sub>2</sub>S<sub>4</sub>/g-C<sub>3</sub>N<sub>4</sub> ternary heterojunction with enhanced visible-light photocatalytic performance**

Jingzhe Li,<sup>a</sup> Yue Chen,<sup>a</sup> Liezhen Zhu,<sup>a</sup> Linfa Liao,<sup>a</sup> Xinmao Wang,<sup>a</sup> Xun Xu,<sup>a</sup> Lingfang Qiu,<sup>a</sup> Jiangbo Xi,<sup>b</sup> Ping Li\*<sup>a</sup> and Shuwang Duo\*<sup>a</sup>

<sup>a</sup> Jiangxi Key Laboratory of Surface Engineering, School of Materials and Mechanical & Electrical Engineering, Jiangxi Science and Technology Normal University, Nanchang, Jiangxi 330013, P. R. China. E-mail: lp1849065552@163.com, dsw@jxstnu.edu.cn

<sup>b</sup> Key Laboratory of Novel Biomass-Based Environmental and Energy Materials in Petroleum and Chemical Industry, Key Laboratory of Green Chemical Engineering Process of Ministry of Education, Engineering Research Center of Phosphorus Resources Development and Utilization of Ministry of Education, Hubei Key Laboratory of Novel Reactor and Green Chemical Technology, School of Chemistry and Environmental Engineering, Wuhan Institute of Technology, Wuhan, 430073, P.R. China.

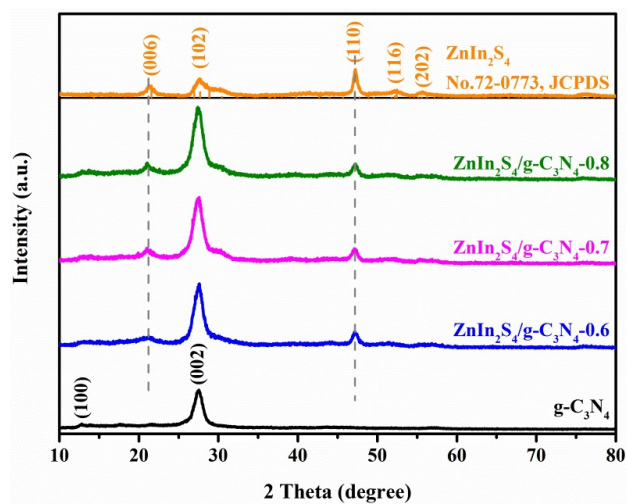

**Fig. S1** The XRD patterns of  $g\text{-C}_3\text{N}_4$ ,  $\text{ZnIn}_2\text{S}_4$ , and  $\text{ZnIn}_2\text{S}_4/g\text{-C}_3\text{N}_4\text{-X}$  ( $X = 0.6, 0.7$  and  $0.8$ ).

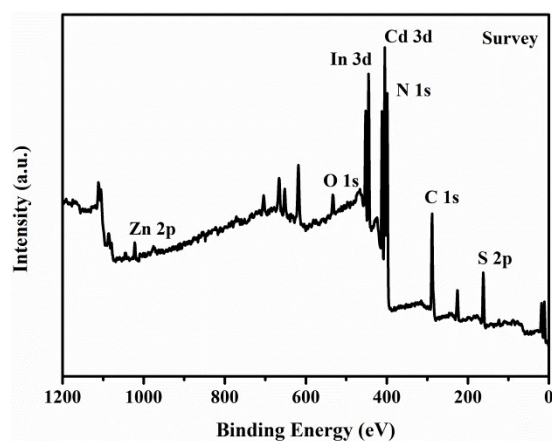

**Fig. S2** The survey XPS spectrum of  $\text{CdS}/\text{ZnIn}_2\text{S}_4/g\text{-C}_3\text{N}_4\text{-0.2}$ .

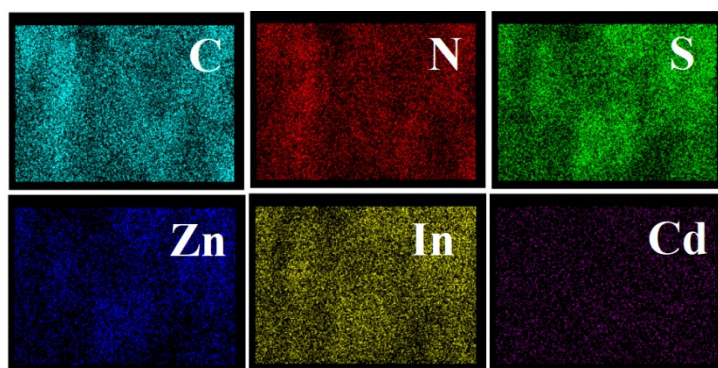

**Fig. S3** EDS elements mappings of  $\text{CdS}/\text{ZnIn}_2\text{S}_4/g\text{-C}_3\text{N}_4\text{-0.2}$  heterostructure.

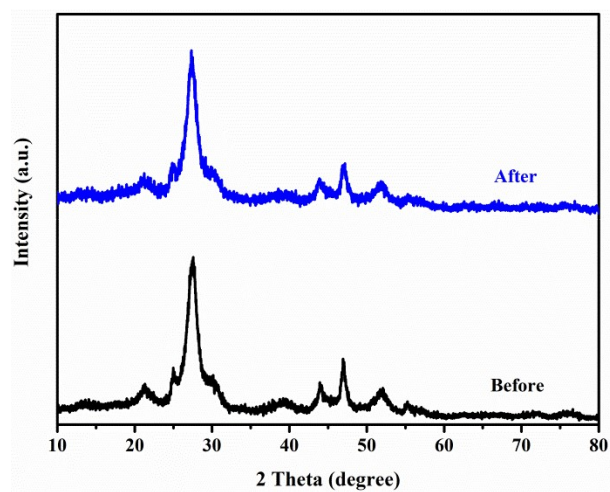

**Fig. S4** XRD patterns of fresh and used CdS/ZnIn<sub>2</sub>S<sub>4</sub>/g-C<sub>3</sub>N<sub>4</sub>-0.2 in the recycled photocatalytic experiments.

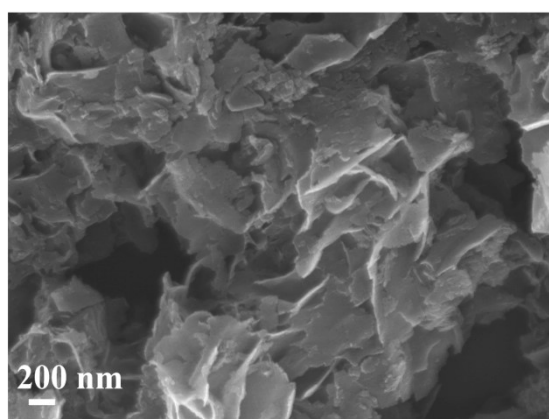

**Fig. S5** SEM image of used CdS/ZnIn<sub>2</sub>S<sub>4</sub>/g-C<sub>3</sub>N<sub>4</sub>-0.2 after four cycles.
